# Supplementary material for: Spatial and temporal autocorrelations affect Taylor's law for US county populations: Descriptive and predictive models
Source: PLoS One. 2021 Jan 7;16(1):e0245062. doi: 10.1371/journal.pone.0245062 (PMC7790542; doi:10.1371/journal.pone.0245062)
Supplement: S14 Table — p_value is defined in S10 Table. (XLSX) [file pone.0245062.s017.xlsx]

## Sheet: bart_cnt_acrosscensus_bystate
Table S14. Bartlett test of homogeneity of the spatial variances of county population counts across censuses within each state. p_value is defined in Table S10.
state	p_value
Alabama	0
Alaska	2.93468e-08
Alaska Territory	0.0541248
Arizona	1.1405e-48
Arizona Territory	0.00488028
Arkansas	0
California	0
Colorado	2.37646e-145
Connecticut	3.73589e-54
Delaware	3.69539e-11
Florida	0
Georgia	0
Hawaii	0.915751
Hawaii Territory	0.00610686
Idaho	1.17304e-106
Illinois	0
Indiana	0
Iowa	6.62948e-236
Kansas	5.15362e-272
Kentucky	0
Louisiana	1.37766e-140
Maine	3.34954e-18
Maryland	4.669e-134
Massachusetts	6.88781e-54
Michigan	0
Minnesota	1.08328e-281
Mississippi	3.0102e-228
Missouri	0
Montana	4.27665e-36
Nebraska	1.15975e-157
Nevada	1.05133e-195
New Hampshire	6.89447e-27
New Jersey	1.6731e-133
New Mexico	6.1376e-71
New Mexico Territory	0.166128
New York	0
North Carolina	0
North Dakota	3.47666e-59
Ohio	0
Oklahoma	1.60164e-107
Oregon	1.29513e-126
Pennsylvania	1.87025e-265
Rhode Island	8.83633e-17
South Carolina	6.31858e-176
South Dakota	4.58858e-94
Tennessee	0
Texas	0
Utah	1.20545e-64
Utah Territory	4.55271e-10
Vermont	1.43923e-18
Virginia	0
Washington	6.15603e-103
West Virginia	6.33077e-90
Wisconsin	6.90757e-176
Wyoming	2.1445e-20
