# Supplementary material for: Spatial and temporal autocorrelations affect Taylor's law for US county populations: Descriptive and predictive models
Source: PLoS One. 2021 Jan 7;16(1):e0245062. doi: 10.1371/journal.pone.0245062 (PMC7790542; doi:10.1371/journal.pone.0245062)
Supplement: S15 Table — p_value is defined in S10 Table. (XLSX) [file pone.0245062.s018.xlsx]

## Sheet: bart_cnt_acrosscounty_bystate
Table S15. Bartlett test of homogeneity of the temporal variances of county population counts across counties within each state. p_value is defined in Table S10.
state	p_value
Alabama	0
Alaska	3.82942e-55
Alaska Territory	0.00362492
Arizona	3.82798e-105
Arizona Territory	0.00397069
Arkansas	0
Arkansas Territory	0.0659872
California	0
Colorado	0
Connecticut	1.50108e-49
Dakota Territory	0.34305
District Of Columbia	1.13211e-17
Florida	0
Florida Territory	0.106129
Georgia	0
Hawaii	1.27119e-14
Hawaii Territory	8.20819e-10
Idaho	0
Idaho Territory	0.338775
Illinois	0
Indiana	0
Iowa	0
Kansas	0
Kentucky	0
Louisiana	0
Maine	6.62999e-83
Maryland	2.63367e-291
Massachusetts	1.02415e-127
Michigan	0
Michigan Territory	0.0545707
Minnesota	0
Mississippi	0
Missouri	0
Montana	0
Montana Territory	0.0351193
Nebraska	0
Nevada	3.57999e-265
New Hampshire	1.85913e-54
New Jersey	3.11324e-80
New Mexico	3.62766e-195
New Mexico Territory	0.000847936
New York	0
North Carolina	0
North Dakota	4.52023e-209
Ohio	0
Oklahoma	0
Oklahoma Territory	0.712152
Oregon	4.08063e-294
Pennsylvania	0
Rhode Island	6.48746e-39
South Carolina	1.58387e-291
South Dakota	0
Tennessee	0
Texas	0
Utah	0
Utah Territory	1.92537e-12
Vermont	6.23864e-86
Virginia	0
Washington	0
Washington Territory	0.022138
West Virginia	3.89809e-267
Wisconsin	0
Wyoming	5.67455e-83
Wyoming Territory	0.821194
