# Supplementary material for: Spatial and temporal autocorrelations affect Taylor's law for US county populations: Descriptive and predictive models
Source: PLoS One. 2021 Jan 7;16(1):e0245062. doi: 10.1371/journal.pone.0245062 (PMC7790542; doi:10.1371/journal.pone.0245062)
Supplement: S23 Table — Other columns are defined in S21 Table. (XLSX) [file pone.0245062.s026.xlsx]

## Sheet: TTL_T_mod_aicc
Table S23. Summary statistics of five distribution models of county population counts within each state (within at least five counties in each state). size is the number of combinations of censuses and counties. Other columns are defined in Table S21.
state	size	lik_max	aicc_tweedie	aicc_logseries	aicc_poilog	aicc_zipf	aicc_nbinom	wt_logseries	wt_negbinom	wt_poilog	wt_tweedie	wt_zipf
Alabama	1216	-13807.7	27621.5	30950.6	27549.6	28030.9	32815.5	0	0	1	2.53e-16	3.15e-105
Alaska	157	-1631.13	3268.1	3585.82	3277.62	3393.95	3394.52	1.01e-69	3.51e-28	0.0085076	0.991492	4.65e-28
Alaska Territory	22	-231.053	466.773	546.858	464.439	479.313	NA	9.66e-19	NA	0.76223	0.23732	0.000449
Arizona	143	-1771.26	3548.34	3860.67	3558.25	3722.94	NA	1.5e-68	NA	0.0070034	0.993	1.21e-38
Arizona Territory	48	-483.277	972.008	1085.65	974.749	970.825	1069.02	6.88e-26	2.81e-22	0.0829831	0.326701	0.590315
Arkansas	1255	-13661.4	27328.9	30662.6	27254.3	27592.9	31698.4	0	0	1	6.53e-17	3.09e-74
Arkansas Territory	30	-242.308	489.694	569.939	487.791	497.674	516.387	1.04e-18	4.43e-07	0.717678	0.277194	0.00512801
California	918	-11474.7	22955.5	24126.3	22804.2	24357.8	28689.1	8.17e-288	0	1	1.45e-33	0
Colorado	834	-8976.51	17959	19419.8	18000.7	18923.7	19712.8	6.09581158232805e-318	0	8.56e-10	1	3.26e-210
Colorado Territory	21	-177.758	360.105	403.583	358.658	358.646	371.453	7.05e-11	0.000668343	0.401218	0.194593	0.403521
Connecticut	184	-2368.91	4743.7	5208.49	4754.35	4809.67	7026.96	1.17e-101	0	0.00483849	0.995162	4.7e-15
Dakota Territory	84	-687.327	1380.35	1432.65	1387.65	1426.25	1398.5	4.29e-12	0.000111873	0.0253605	0.974528	1.05e-10
District Of Columbia	32	-404.564	814.271	848.169	816.578	853.177	NA	3.31e-08	NA	0.23981	0.76019	2.71e-09
Florida	937	-11005.8	22017.5	23527.7	22009.9	23127.9	23716.6	0	0	0.978448	0.0215523	1.61e-243
Florida Territory	36	-316.139	637.528	709.423	637.873	634.377	717.303	3.66e-17	7.12e-19	0.126092	0.149793	0.724115
Georgia	2793	-30186.9	60379.8	67289.3	60178.7	61682.3	64452.9	0	0	1	2.09e-44	0
Hawaii	29	-371.05	747.139	776.939	758.522	769.299	NA	3.37e-07	NA	0.00336	0.99662	1.54e-05
Hawaii Territory	28	-338.305	681.61	730.92	691.193	679.084	NA	4.32e-12		0.00183	0.22006	0.77811
Idaho	502	-5319.21	10644.4	11788.4	10658.3	10811.7	12897.4	3.77e-249	0	0.000944688	0.999055	4.6e-37
Idaho Territory	22	-187.034	378.734	434.26	377.594	381.239	400.42	2.87e-13	6.4e-06	0.579039	0.327393	0.0935617
Illinois	1886	-21976.5	43959	47652.9	43405.5	45621.9	48458.2	0	0	1	6.69e-121	0
Indian Territory	12	-126.35	255.7	264.544	254.882	274.543	NA	0.0047697	NA	0.598	0.39719	3.22e-05
Indiana	1748	-19872.8	39751.6	43903.8	39516.2	40099.9	45766.9	0	0	1	7.98e-52	1.78e-127
Indiana Territory	8	-73.1369	146.274	167.25	144.729	146.561	187.756	6.91e-06	2.44e-10	0.537029	0.248044	0.21492
Iowa	1630	-17956.6	35919.2	39865.2	36146.1	35988.1	40012.1	0	0	5.55e-50	1	1.13e-15
Iowa Territory	18	-156.701	317.688	357.228	317.385	315.436	368.133	4.95e-10	2.12e-12	0.221812	0.190576	0.587612
Kansas	1534	-16552.3	33110.6	35864.1	33062.2	33187.4	33988.9	0	6.09e-202	1	3.21e-11	6.65e-28
Kansas Territory	42	-379.217	763.803	810.45	765.203	768.248	803.945	4.63e-11	1.2e-09	0.309469	0.623037	0.067494
Kentucky	2334	-25003.3	50012.7	56408.8	49749.6	50919.8	54023.9	0	0	1	7.36e-58	7.75e-255
Louisiana	1118	-12640.6	25287.1	28008.9	25255.1	25740.8	27437.5	0	0	1	1.12e-07	3.42e-106
Louisiana Territory	7	-62.5637	123.127	141.589	123.818	124.51	144.288	4.43e-05	1.15e-05	0.320492	0.452653	0.226799
Maine	301	-3498.16	7002.23	8024.63	7014.89	7153.04	8562.99	9.77e-223	0	0.00178699	0.998213	1.79e-33
Maryland	520	-6202.65	12411.3	13692.9	12438	12824.2	16067.6	5.05e-279	0	1.58e-06	0.999998	2.12e-90
Massachusetts	340	-4464.67	8935.26	9563.54	8955.95	9018.3	NA	3.73e-137	NA	3.22e-05	0.99997	9.3e-19
Michigan	1366	-16120.8	32247.7	34421.3	32048.9	32953.8	38027.4	0	0	1	7.04e-44	3.31e-197
Michigan Territory	27	-226.814	458.584	504.667	467.176	454.676	458.14	1.06e-11	0.134011	0.00146234	0.107313	0.757214
Minnesota	1331	-15048.9	30103.8	32284.3	30043.4	30316.7	34290	0	0	1	7.8e-14	4.72e-60
Minnesota Territory	9	-66.7372	134.674	151.023	133.455	134.725	137.216	6.88e-05	0.0684967	0.449222	0.244136	0.238077
Mississippi	1406	-15363.1	30732.1	34688	30685.1	31028.3	35035.1	0	0	1	6.12e-11	2.93e-75
Mississippi Territory	14	-124.533	252.666	293.336	251.669	255.691	318.057	5.14e-10	2.2e-15	0.574241	0.348878	0.0768802
Missouri	2031	-22317.4	44640.7	49725.9	44449.1	45931.8	51848.2	0	0	1	2.44e-42	1.08694442085074e-322
Missouri Territory	15	-137.111	278.04	320.968	276.457	281.203	354.295	1.4e-10	8.1e-18	0.646595	0.293121	0.0602842
Montana	631	-6551.71	13109.4	14354.8	13069.1	13159.8	14196.1	6.54e-280	1.9e-245	1	1.78e-09	2.04e-20
Montana Territory	22	-195.248	395.164	434.601	402.239	391.302	417.098	3.45e-10	2.18e-06	0.00366975	0.126187	0.870142
Nebraska	1329	-13940.7	27887.4	30150.8	27775.1	28065.1	29972.7	0	0	1	3.99e-25	1.08e-63
Nebraska Territory	34	-254.027	513.255	537.233	513.657	527.643	520.648	3.37e-06	0.0134596	0.443678	0.542452	0.00040749
Nevada	243	-2514.22	5034.34	5446.89	5038.33	5579.61	6085.77	2.29e-90	4.27e-229	0.119787	0.880213	3.47e-119
New Hampshire	208	-2446.15	4898.18	5539.62	4884.77	4967.08	6435.22	6.34e-143	0	0.998776	0.00122391	1.34e-18
New Jersey	440	-5643.28	11292.5	12276.9	11341.3	11450.4	16326	1.72e-214	0	2.48e-11	1	5.14e-35
New Mexico	318	-3580.26	7166.44	7860.5	7152.29	7266.18	9147.6	1.64e-154	0	0.999155	0.000845295	1.86e-25
New Mexico Territory	102	-1013.51	2032.78	2372.14	2043.71	2086.63	2600.81	2.03e-74	4.47e-124	0.00419966	0.9958	2.02e-12
New York	1292	-16287.9	32581.8	35527.6	32566.2	33551.3	39420.8	0	0	0.999588	0.000411974	1.21e-214
North Carolina	2010	-22563	45132.1	50307	45128.4	45869.8	48806.9	0	0	0.863074	0.136926	8.88e-162
North Dakota	672	-6934.1	13874.2	15278.5	13961.8	13875.3	14479.4	7.18e-306	2.41e-132	6.03e-20	0.638882	0.361118
Northwest Territory	7	-67.3303	132.661	155.685	131.225	135.462	175.616	3.04e-06	1.43e-10	0.621815	0.303405	0.0747767
Ohio	1742	-20900.1	41806.2	45681.6	41468.9	42247.7	48197.7	0	0	1	5.77e-74	7.97e-170
Oklahoma	846	-9505.21	19016.4	21292.3	18946.5	19358.1	20272	0	1.44e-288	1	6.55e-16	4.09e-90
Oklahoma Territory	35	-363.251	731.728	824.983	736.695	733.172	872.734	3.58e-21	1.53e-31	0.0531857	0.6373	0.309514
Oregon	522	-5950.21	11906.4	12824.2	11887	12195.5	14720	3.09e-204	0	0.999938	6.2e-05	1.04e-67
Oregon Territory	10	-78.9715	159.943	188.789	158.429	162.683	196.784	1.61e-07	2.95e-09	0.62964	0.295315	0.0750451
Orleans Territory	20	-179.505	363.51	415.395	362.221	370.812	451.263	1.85e-12	3e-20	0.649923	0.34122	0.00885733
Pennsylvania	1385	-17258.1	34522.2	37310.8	34366.5	34862.9	42891.9	0	0	1	1.5e-34	1.58e-108
Puerto Rico	78	-908.764	1823.2	2048.13	1815.4	1837.02	2815.15	2.85e-51	7.92e-218	0.980141	0.0198396	1.98e-05
Rhode Island	115	-1404.74	2815.27	3069.48	2823.61	2875.42	4238.09	6.19e-56	0	0.0151835	0.984816	8.54e-14
South Carolina	860	-9894.2	19794.4	22292.4	19786.9	20091.7	24914	0	0	0.976811	0.0231892	6.31e-67
South Dakota	863	-8763.61	17533.2	19382.6	17635.2	17544.4	17698.2	0	1.45e-36	6.89e-23	0.996402	0.00359827
Tennessee	1817	-20143.1	40292.1	44887.1	40122.2	41022.1	47034.9	0	0	1	1.24e-37	3.86e-196
Texas	3829	-42459.2	84924.4	89846.9	84411.5	87860.2	87614	0	0	1	4.17e-112	0
Utah	344	-3775.44	7556.81	8175.83	7574.25	7945.5	8458.59	3.82e-135	1.52e-196	0.000163806	0.999836	3.96e-85
Utah Territory	95	-904.051	1813.84	1949.16	1818.71	1818.05	1907.17	3.41e-30	4.48e-21	0.0723801	0.827038	0.100581
Vermont	308	-3403.51	6812.93	7738.42	6841.46	6890.94	7893.16	1.08e-201	2.7e-235	6.4e-07	0.999999	1.15e-17
Virginia	2733	-29635.6	59277.3	66393.3	59118.6	60489.8	63268.7	0	0	1	3.46e-35	1.71e-298
Washington	498	-5877.32	11760.6	12691.7	11774.4	12170.4	NA	6.51e-203	NA	0.000991	0.99901	1.02e-89
Washington Territory	66	-552.359	1110.33	1219.86	1108.97	1112.31	1132.45	4.9e-25	4.69e-06	0.590432	0.298654	0.110909
West Virginia	821	-9063.28	18132.5	20470	18152.5	18392.4	20988.5	0	0	4.59e-05	0.999954	3.63e-57
Wisconsin	1134	-13226.8	26459.6	28868.1	26320.4	26557	31388.2	0	0	1	6.01e-31	4.21e-52
Wisconsin Territory	22	-179.932	364.531	386.45	364.744	363.01	373.104	4.29e-06	0.00339388	0.221814	0.246818	0.527971
Wyoming	274	-2885.94	5777.8	6418.05	5780.78	5789.28	6314.95	7.62e-140	1.86e-117	0.183798	0.813587	0.0026156
Wyoming Territory	12	-104.75	212.5	240.014	212.456	210.746	245.1	2.4e-07	1.88e-08	0.231006	0.225988	0.543006
