# Supplementary material for: Spatial and temporal autocorrelations affect Taylor's law for US county populations: Descriptive and predictive models
Source: PLoS One. 2021 Jan 7;16(1):e0245062. doi: 10.1371/journal.pone.0245062 (PMC7790542; doi:10.1371/journal.pone.0245062)
Supplement: S36 Table — The models are cx (Cohen-Xu model), reg_ols (ordinary least-squares linear regression), reg_best (least-squares linear regression with the smallest AICc), tweedie (Tweedie model), and xlw (Xiao-Locey-White model). n is the number of finite mean-variance pairs used in each model fitting. The last four columns show TL slope (b), standard error of the slope (b_se), and lower bound of the slope (b_lower) and upper bound of the slope (b_upper) using adjusted critical t value (upper tail probability is 0.025/23) according to the Bonferroni correction. (XLSX) [file pone.0245062.s039.xlsx]

## Sheet: SHTL_b_pred_compare
Table S36. Spatial hierarchical TL's slope across five models in each census (year). The models are cx (Cohen-Xu model), reg_ols (ordinary least-squares linear regression), reg_best (least-squares linear regression with the smallest AICc), tweedie (Tweedie model), and xlw (Xiao-Locey-White model). n is the number of finite mean-variance pairs used in each model fitting. The last four columns show…
year	model	n	b	b_se	b_lower	b_upper
1790	cx	14	4.44907	0.442726	2.76315	6.13498
1790	reg_ols	14	2.1841	1.1517	-2.20161	6.56981
1790	reg_best	14	2.1841	1.1517	-2.20161	6.56981
1790	tweedie	14	2.8731	0.475	1.06428	4.68192
1790	xlw	14	1.7016	0.2818	0.628496	2.7747
1800	cx	19	7.34713	0.953487	3.94033	10.7539
1800	reg_ols	19	1.9269	0.2699	0.962548	2.89125
1800	reg_best	19	1.9269	0.2699	0.962548	2.89125
1800	tweedie	19	2.5465	0.475	0.849327	4.24367
1800	xlw	19	1.8392	0.1919	1.15354	2.52486
1810	cx	24	7.20322	0.906074	4.07663	10.3298
1810	reg_ols	24	1.9318	0.2352	1.1202	2.7434
1810	reg_best	24	1.9318	0.2352	1.1202	2.7434
1810	tweedie	24	2.3424	0.475	0.703321	3.98148
1810	xlw	24	1.8473	0.1706	1.25861	2.43599
1820	cx	26	3.20799	0.610552	1.12186	5.29412
1820	reg_ols	26	1.5383	0.1586	0.996397	2.0802
1820	reg_best	26	1.5383	0.1586	0.996397	2.0802
1820	tweedie	26	2.3424	0.475	0.719424	3.96538
1820	xlw	26	1.7118	0.1456	1.21432	2.20928
1830	cx	28	4.15268	0.817514	1.38265	6.92272
1830	reg_ols	28	1.6741	0.1418	1.19363	2.15457
1830	reg_best	28	1.6741	0.1418	1.19363	2.15457
1830	tweedie	28	2.1424	0.38	0.854822	3.42998
1830	xlw	28	1.5902	0.1201	1.18326	1.99714
1840	cx	30	5.56468	0.961623	2.32961	8.79976
1840	reg_ols	30	1.7418	0.1556	1.21833	2.26527
1840	reg_best	30	1.7418	0.1556	1.21833	2.26527
1840	tweedie	30	2.2404	0.4275	0.802212	3.67859
1840	xlw	30	1.5691	0.1071	1.2088	1.9294
1850	cx	36	6.78665	0.918922	3.74561	9.8277
1850	reg_ols	36	1.8351	0.1399	1.37212	2.29808
1850	reg_best	36	1.8351	0.1399	1.37212	2.29808
1850	tweedie	36	2.2037	0.4275	0.788948	3.61845
1850	xlw	36	1.6757	0.0974	1.35337	1.99803
1860	cx	38	7.80312	0.954843	4.65663	10.9496
1860	reg_ols	38	1.7875	0.137	1.33604	2.23896
1860	reg_best	38	1.7875	0.137	1.33604	2.23896
1860	tweedie	38	2.0159	0.3325	0.920214	3.11159
1860	xlw	38	1.5788	0.0804	1.31386	1.84374
1870	cx	46	6.66472	0.707456	4.36393	8.96551
1870	reg_ols	46	1.9901	0.1108	1.62976	2.35044
1870	reg_best	46	1.9901	0.1108	1.62976	2.35044
1870	tweedie	46	2.0445	0.3325	0.963142	3.12586
1870	xlw	46	1.7601	0.0806	1.49797	2.02223
1880	cx	47	7.11123	0.708666	4.80954	9.41293
1880	reg_ols	47	2.0468	0.1327	1.6158	2.4778
1880	reg_best	47	2.0468	0.1327	1.6158	2.4778
1880	tweedie	47	1.971	0.285	1.04534	2.89666
1880	xlw	47	1.703	0.0802	1.44252	1.96348
1890	cx	49	6.44942	0.557837	4.64207	8.25678
1890	reg_ols	49	2.1384	0.1641	1.60673	2.67007
1890	reg_best	49	2.1384	0.1641	1.60673	2.67007
1890	tweedie	49	2.0159	0.3325	0.938622	3.09318
1890	xlw	49	1.7236	0.0808	1.46181	1.98539
1900	cx	51	6.39141	0.508654	4.74713	8.0357
1900	reg_ols	51	2.2925	0.2165	1.59264	2.99236
1900	reg_best	51	2.4303	0.1968	1.79412	3.06648
1900	tweedie	51	2.1751	0.38	0.946708	3.40349
1900	xlw	51	1.7268	0.0848	1.45267	2.00093
1910	cx	49	6.00697	0.486604	4.4304	7.58353
1910	reg_ols	49	2.4733	0.1898	1.85836	3.08824
1910	reg_best	49	2.4733	0.1898	1.85836	3.08824
1910	tweedie	49	2.5343	0.4275	1.14923	3.91937
1910	xlw	49	1.7188	0.0845	1.44503	1.99257
1920	cx	50	5.07109	0.428753	3.68357	6.45862
1920	reg_ols	50	2.4618	0.1808	1.8767	3.0469
1920	reg_best	50	2.5887	0.2118	1.90327	3.27413
1920	tweedie	50	2.5465	0.475	1.00931	4.08369
1920	xlw	50	1.7343	0.0793	1.47767	1.99093
1930	cx	50	4.60768	0.407405	3.28924	5.92612
1930	reg_ols	50	2.3665	0.173	1.80664	2.92636
1930	reg_best	50	2.5594	0.1959	1.92543	3.19337
1930	tweedie	50	2.8282	0.4275	1.44473	4.21167
1930	xlw	50	1.7374	0.0793	1.48077	1.99403
1940	cx	50	4.52749	0.389942	3.26556	5.78942
1940	reg_ols	50	2.3049	0.167	1.76446	2.84534
1940	reg_best	50	2.5224	0.1894	1.90946	3.13534
1940	tweedie	50	2.7914	0.475	1.25421	4.32859
1940	xlw	50	1.7345	0.0745	1.4934	1.9756
1950	cx	50	4.40565	0.387192	3.15262	5.65868
1950	reg_ols	50	2.1406	0.1497	1.65614	2.62506
1950	reg_best	50	2.4352	0.1714	1.88052	2.98988
1950	tweedie	50	2.8282	0.4275	1.44473	4.21167
1950	xlw	50	1.7299	0.0717	1.49786	1.96194
1960	cx	50	4.58014	0.448408	3.129	6.03127
1960	reg_ols	50	1.9909	0.1312	1.56631	2.41549
1960	reg_best	50	2.3301	0.1516	1.83949	2.82071
1960	tweedie	50	2.8731	0.475	1.33591	4.41029
1960	xlw	50	1.7483	0.0664	1.53342	1.96318
1970	cx	50	4.56854	0.476868	3.0253	6.11178
1970	reg_ols	50	1.9023	0.1233	1.50328	2.30132
1970	reg_best	50	2.2529	0.1429	1.79045	2.71535
1970	tweedie	50	2.8649	0.4275	1.48143	4.24837
1970	xlw	50	1.7582	0.0627	1.55529	1.96111
1980	cx	50	4.82907	0.534019	3.10088	6.55726
1980	reg_ols	50	1.857	0.124	1.45571	2.25829
1980	reg_best	50	2.174	0.1431	1.7109	2.6371
1980	tweedie	50	2.8649	0.4275	1.48143	4.24837
1980	xlw	50	1.7591	0.0672	1.54163	1.97657
1990	cx	50	4.97013	0.569431	3.12734	6.81292
1990	reg_ols	50	1.8185	0.1208	1.42757	2.20943
1990	reg_best	50	2.1431	0.1406	1.68809	2.59811
1990	tweedie	50	2.8282	0.4275	1.44473	4.21167
1990	xlw	50	1.7644	0.0598	1.57088	1.95792
2000	cx	50	4.75418	0.551837	2.96833	6.54003
2000	reg_ols	50	1.8043	0.1199	1.41628	2.19232
2000	reg_best	50	2.1221	0.1391	1.67195	2.57225
2000	tweedie	50	2.8282	0.4275	1.44473	4.21167
2000	xlw	50	1.7758	0.0615	1.57677	1.97483
2010	cx	51	4.55154	0.532782	2.82926	6.27382
2010	reg_ols	51	1.7755	0.1185	1.39244	2.15856
2010	reg_best	51	1.9875	0.1161	1.61219	2.36281
2010	tweedie	51	2.6812	0.4275	1.29926	4.06314
2010	xlw	51	1.779	0.061	1.58181	1.97619
